# Supplementary material for: Amorphous–crystalline CoFeB/NiPS3 vertical heterostructure with a built-in electric field for robust ampere-level water oxidation
Source: Royal Society of Chemistry journal article supplement (doi:10.1039/d4ta01168f), 2024-01-01
Supplement: d4ta01168f1.pdf [file d4ta01168f1.pdf]

## Supporting Information for

### Amorphous–Crystalline CoFeB/NiPS<sub>3</sub> Vertical Heterostructure with Built-in Electric Field for Robust Ampere-level Water Oxidation

*Sijia Zhao,<sup>a</sup> Yaoda Liu,<sup>a,\*</sup> Ya Chen,<sup>a</sup> Lei Li,<sup>a</sup> Wenfang Zhai,<sup>a</sup> Zhixin Guo,<sup>a</sup> and Zhengfei Dai<sup>a,\*</sup>*

<sup>a</sup> State Key Laboratory for Mechanical Behavior of Materials, Xi'an Jiaotong University, Xi'an 710049, China.

\*Email: ydliu0618@outlook.com (Y. L.); sensdai@mail.xjtu.edu.cn (Z. D.).

#### 1. Calculation of turnover frequency (TOF):

$$TOF = \frac{1}{4F} \frac{1}{n} \quad (1)$$

In which I (A) represents the current at  $\eta=300$  mV, F ( $\sim 96485$  C mol<sup>-1</sup>) is the Faraday constant and n (mol) is the mole of metal atoms coated on the electrode during OER in 1M KOH. I can be evaluated with the following equation:

$$n = \frac{Q}{2F} \quad (2)$$

Here Q represent the integrated charge from the CV curve, which was obtained through electrochemical measurements in a 1M PBS electrolyte (pH=7), with a scanning rate of 50 mV s<sup>-1</sup> and a potential range of -0.2 to 0.6 V vs. RHE. As mentioned above, F is Faraday constant.

Calculation of mass activity (MA):

$$MA = \frac{j}{m} \quad (3)$$

In which j (mA cm<sup>-2</sup>) is the measured current density at  $\eta=300$  mV, m (mg cm<sup>-2</sup>)=4 mg  $\times$  10  $\mu$ L / 500  $\mu$ L=0.08 mg cm<sup>-2</sup>.

## 2. DFT Calculations of OER Performance:

Under alkaline conditions, the process of OER reaction can be described by the following four steps,

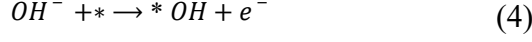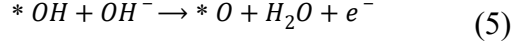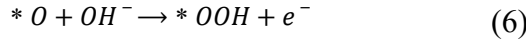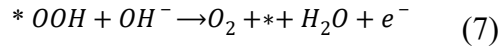

in which \* denotes the pure surface without adsorbed adsorbate, \*O, \*OH, \*OOH denote the surface system with adsorbed intermediate O, OH, and OOH, respectively. The Gibbs free energy variations of the above four reaction steps are represented as  $\Delta G_1$ ,  $\Delta G_2$ ,  $\Delta G_3$ , and  $\Delta G_4$ , respectively.

$$\Delta G_1 = G_{*OH} + \left( \frac{G_{H_2}}{2} - 0.0592PH \right) + eU - G_* - G_{H_2O} \quad (8)$$

$$\Delta G_2 = G_{*O} + \left( \frac{G_{H_2}}{2} - 0.0592PH \right) + eU - G_{*OH} \quad (9)$$

$$\Delta G_3 = G_{*OOH} + \left( \frac{G_{H_2}}{2} - 0.0592PH \right) + eU - G_{*O} - G_{H_2O} \quad (10)$$

$$\Delta G_4 = G_{O_2} + G_* + \left( \frac{G_{H_2}}{2} - 0.0592PH \right) + eU - G_{*OOH} \quad (11)$$

U is the applied electrode potential. The standard electrode potential is 0.401 eV at pH = 14 under alkaline conditions, and the Gibbs free energy change of the determination step is  $G^{OER} = \max(\Delta G_1, \Delta G_2, \Delta G_3, \Delta G_4)$ , and the theoretical calculated overpotential is  $\eta = G^{OER} - 0.401$ . The adsorption sites are shown in Fig. S3 and the calculation results are shown in Table S1.

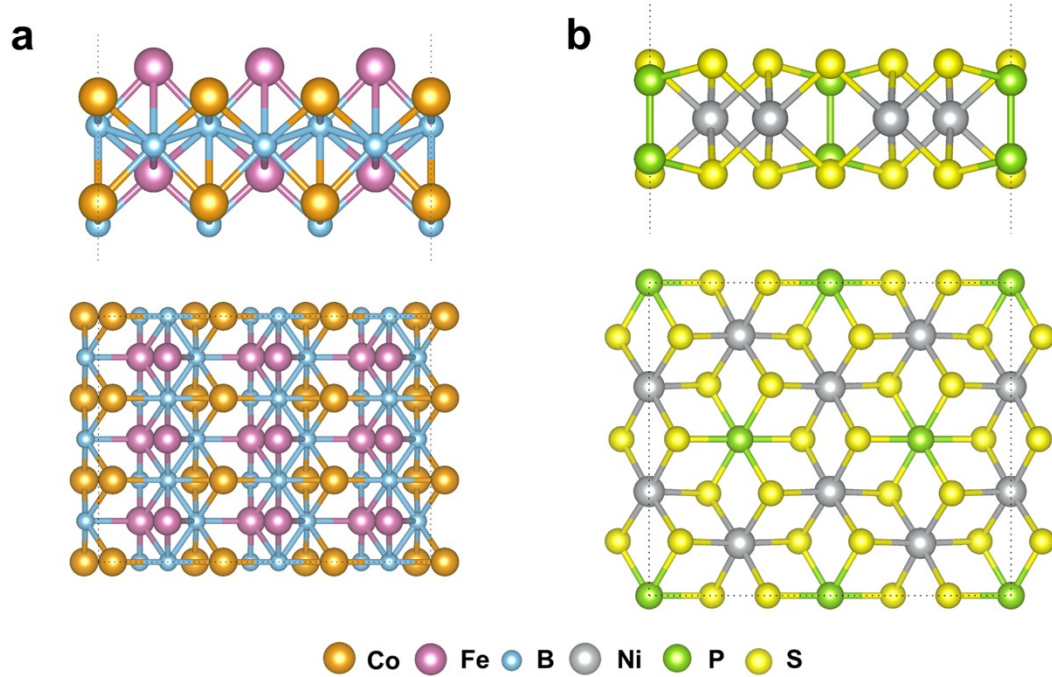

**Fig. S1.** Atomic models of (a) CoFeB and (b) NiPS<sub>3</sub>.

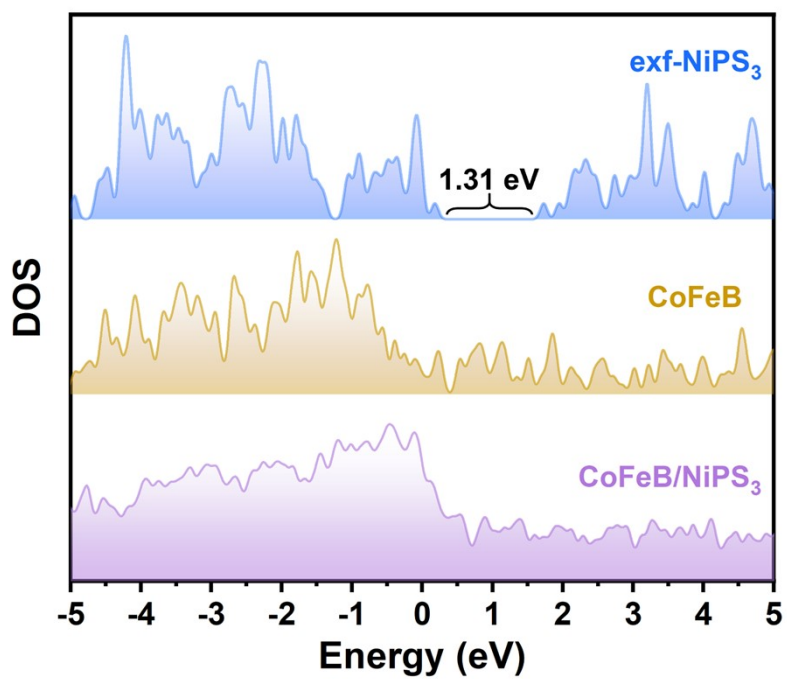

**Fig. S2.** DOS of CoFeB, NiPS<sub>3</sub>, and CoFeB/NiPS<sub>3</sub>.

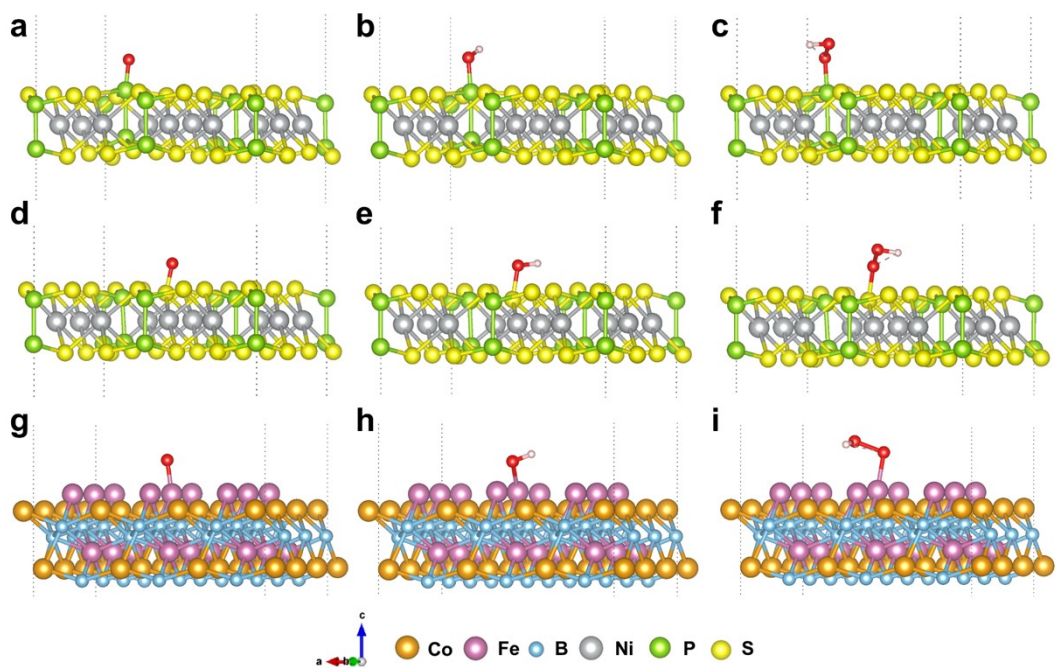

**Fig. S3.** The possible stable adsorption sites of  $*O$ ,  $*OH$ ,  $*OOH$  on the (a-c) P edge of  $NiPS_3$ , (d-f) S edge of  $NiPS_3$ , (g-i) Fe edge of  $CoFeB$ .

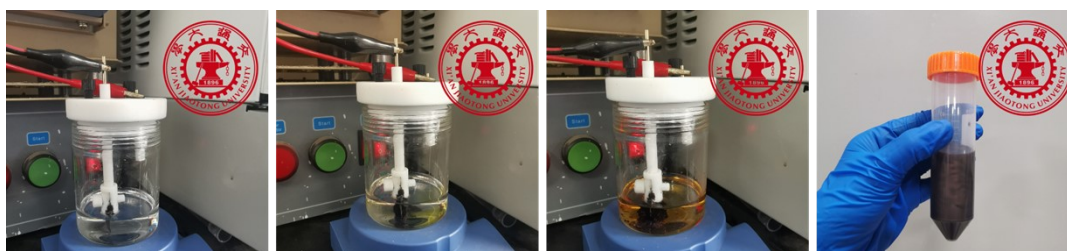

**Fig. S4.** Electrochemical cathode exfoliation process from bulk  $NiPS_3$  to exf- $NiPS_3$  nanosheets.

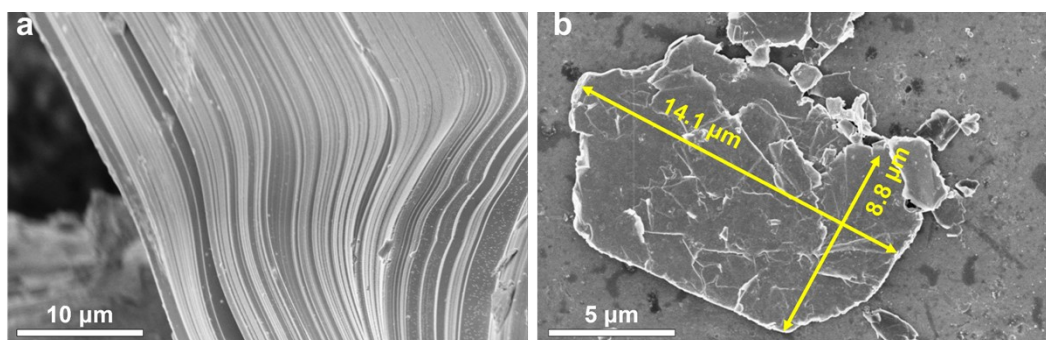

**Fig. S5.** SEM images of (a) the cross-section of bulk  $NiPS_3$  and (b) exf- $NiPS_3$  nanosheets.

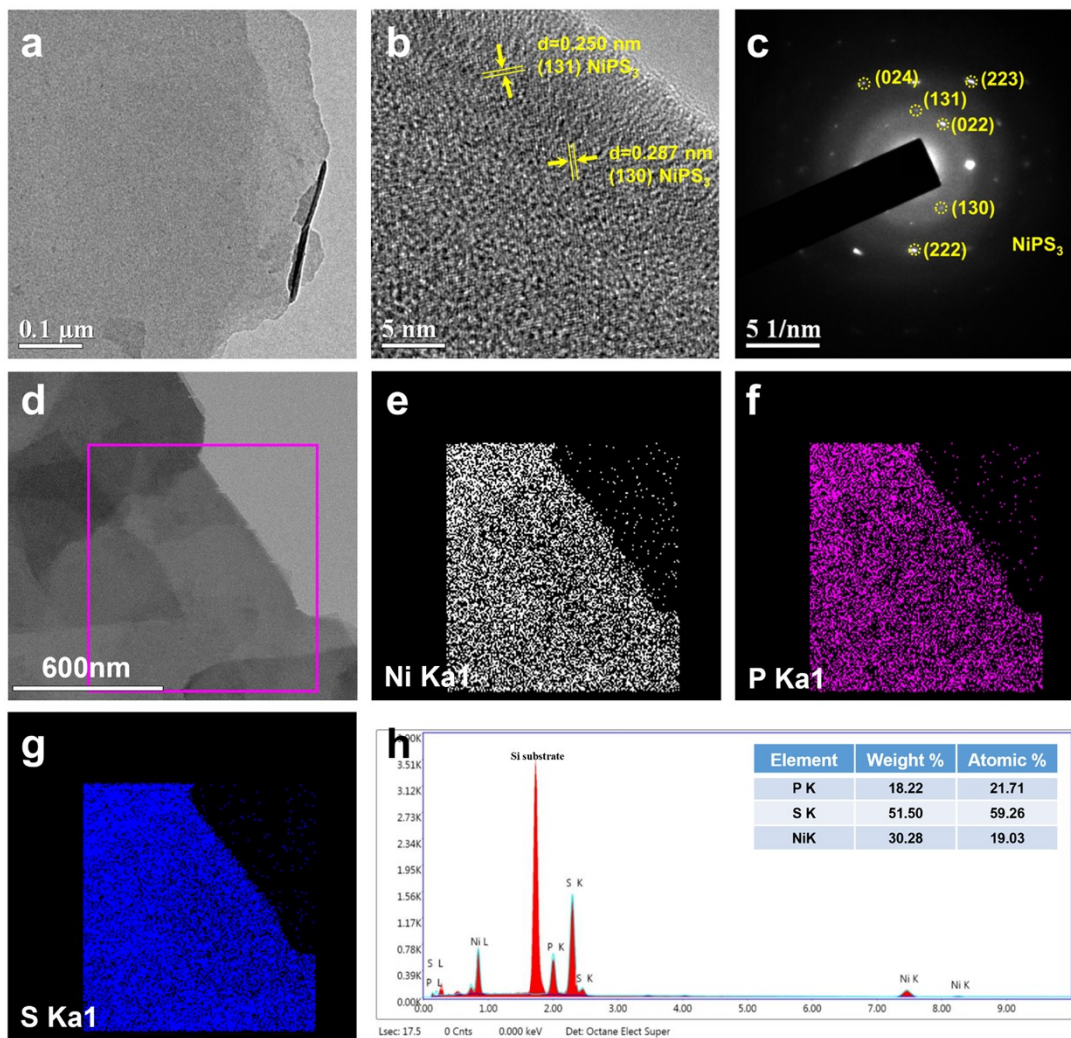

**Fig. S6.** (a) TEM image, (b) HRTEM image, (c) SAED pattern, (d-g) EDX mapping images, and (h) EDS spectrum of exf-NiPS<sub>3</sub>.

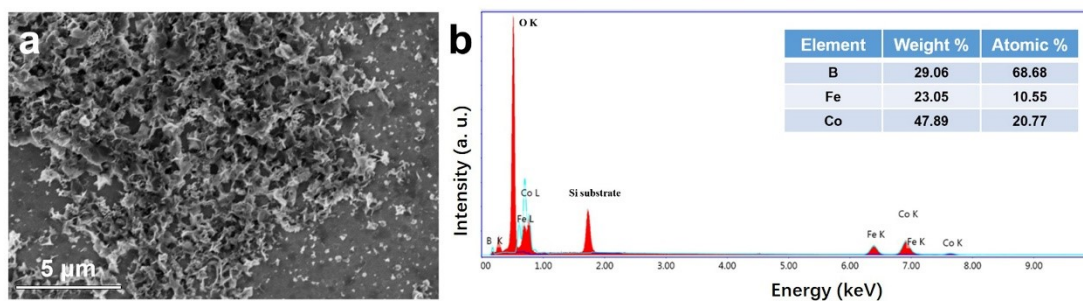

**Fig. S7.** (a) SEM image and (b) EDS spectrum of CoFeB.

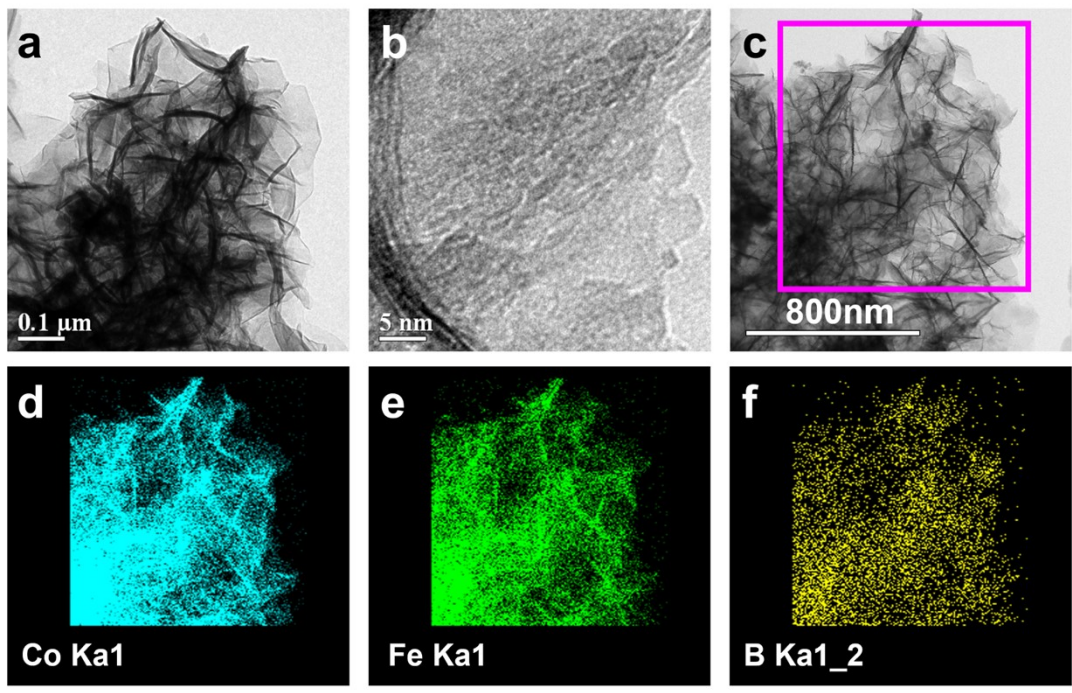

**Fig. S8.** (a) TEM image, (b) HRTEM image, and (c-f) EDX mapping images of CoFeB.

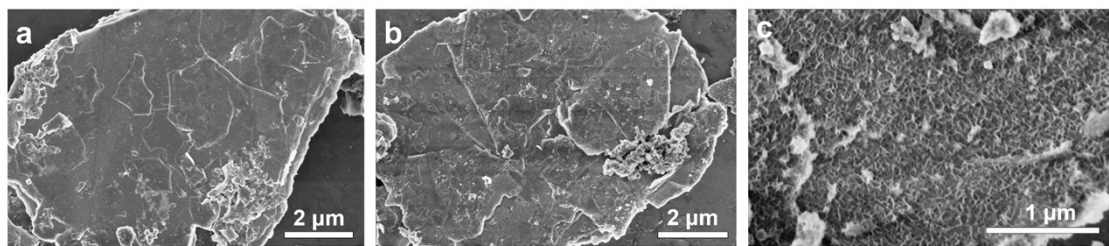

**Fig. S9.** SEM images of (a) CFBN-1, (b) CFBN-2 and (c) CFBN-4.

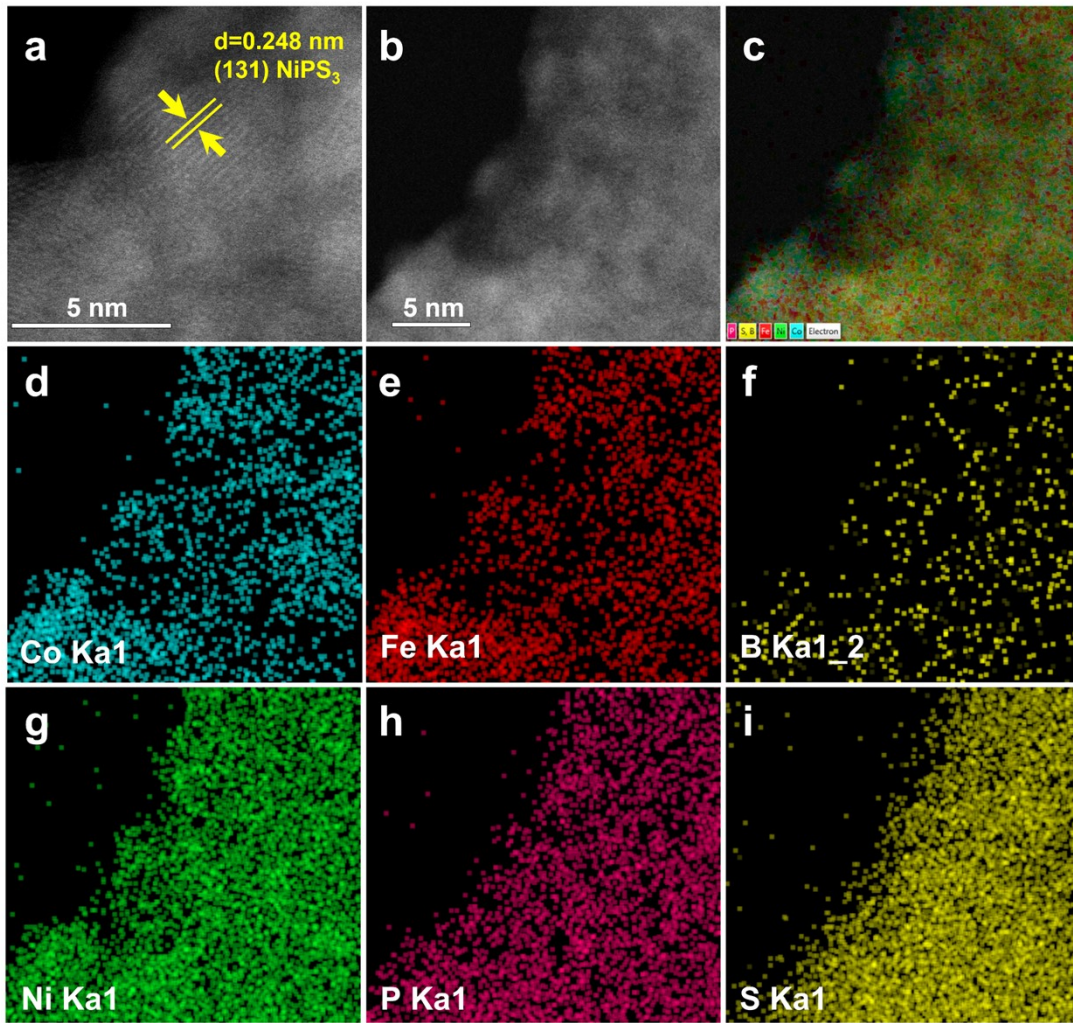

**Fig. S10.** (a) AC-TEM image, (b-i) EDX mapping images of CoFeB/NiPS<sub>3</sub>.

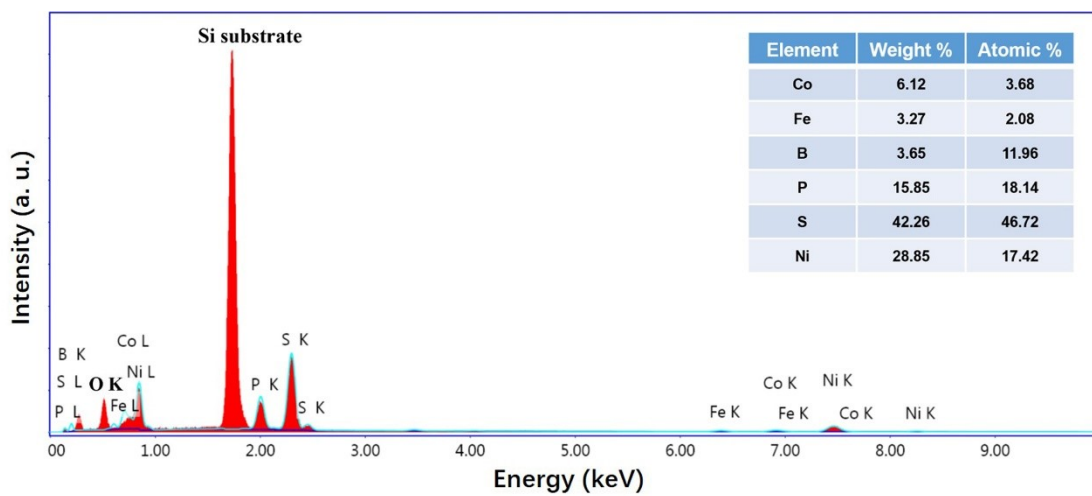

**Fig. S11.** EDS spectrum of CFBN-3.

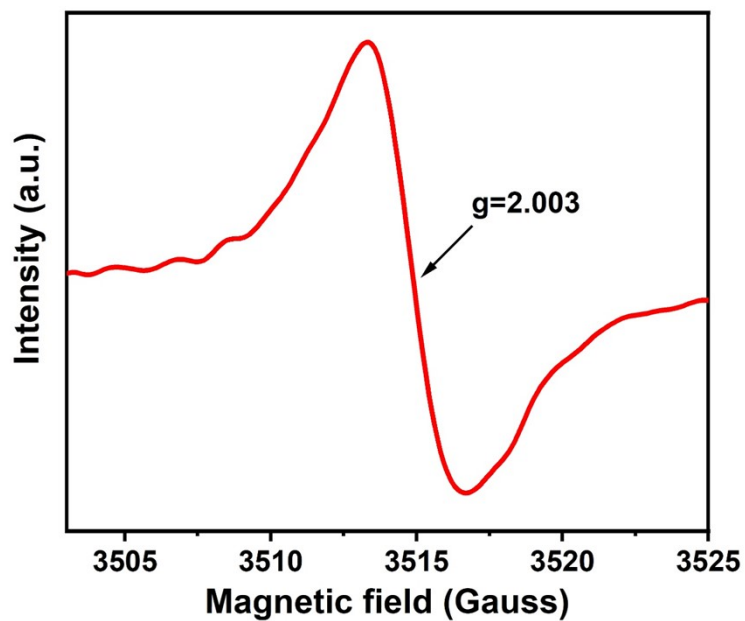

Fig. S12. The room-temperature EPR spectrum of CFBN-3 heterostructure.

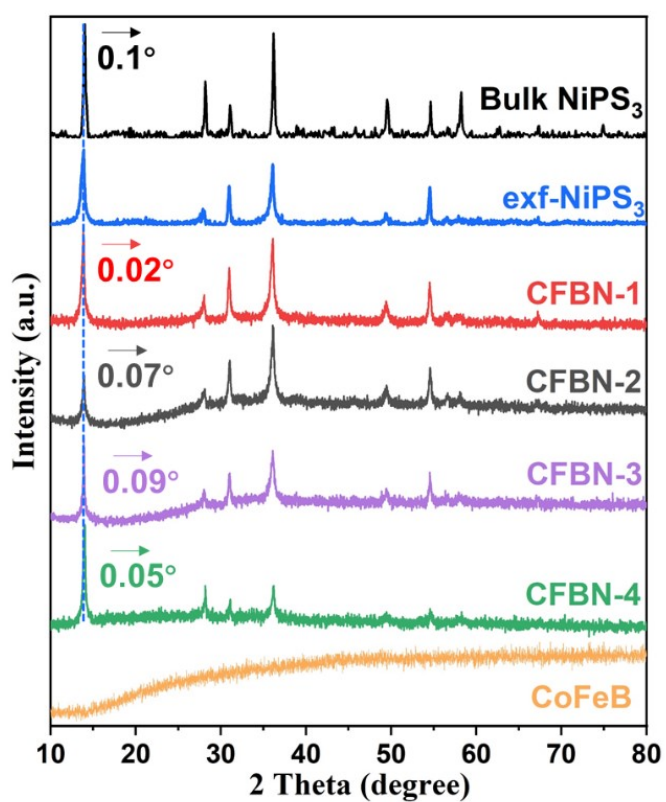

Fig. S13. XRD patterns of CFBN-1, CFBN-2, CFBN-3 and CFBN-4.



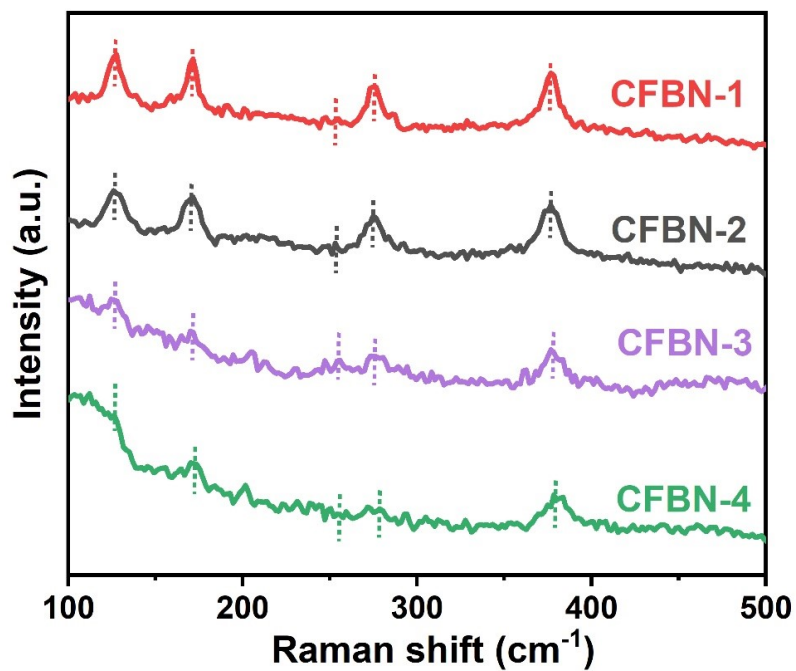

**Fig. S14.** Raman spectra of CFBN-1, CFBN-2, CFBN-3 and CFBN-4.

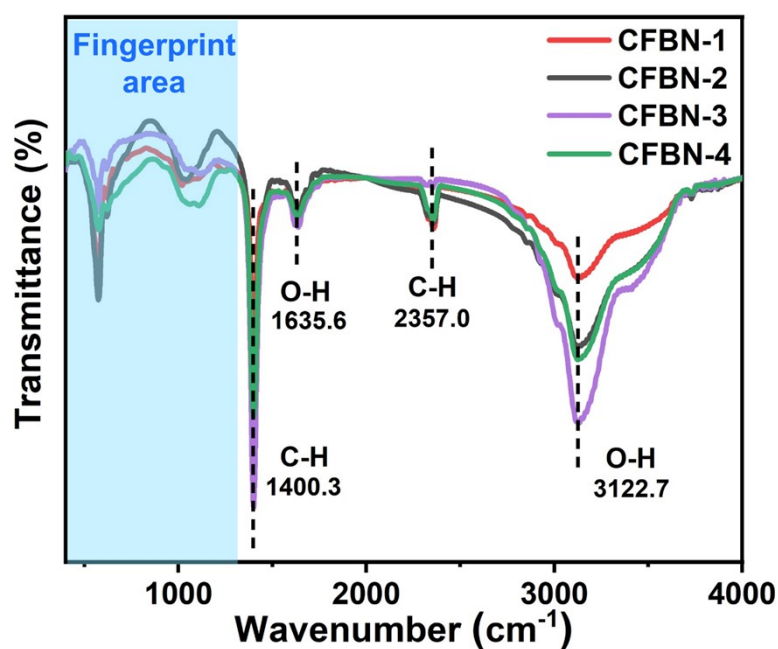

**Fig. S15.** FT-IR spectra of CFBN-1, CFBN-2, CFBN-3 and CFBN-4.

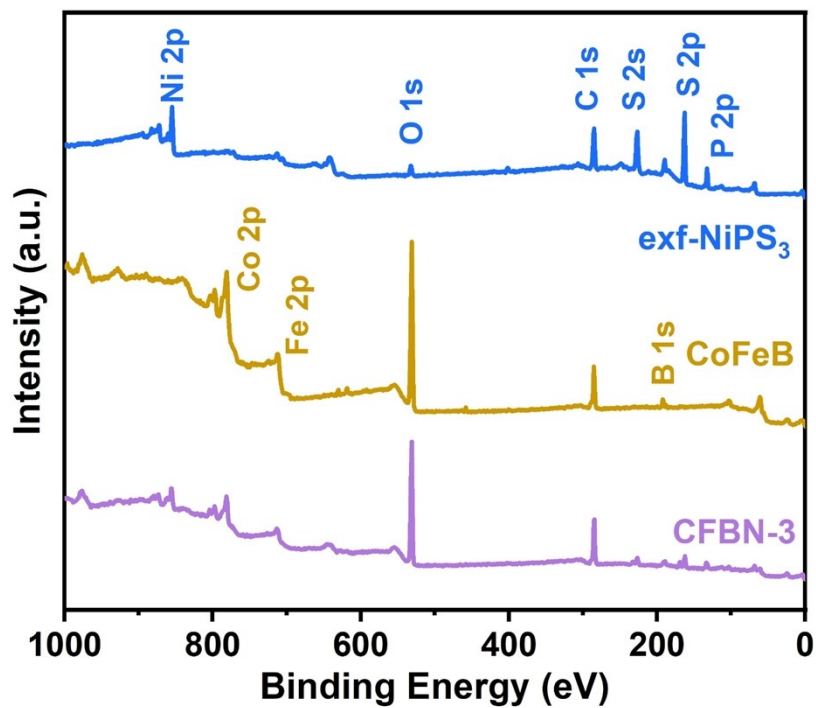

Fig. S16. XPS survey spectra of exf-NiPS<sub>3</sub>, CoFeB and CFBN-3.

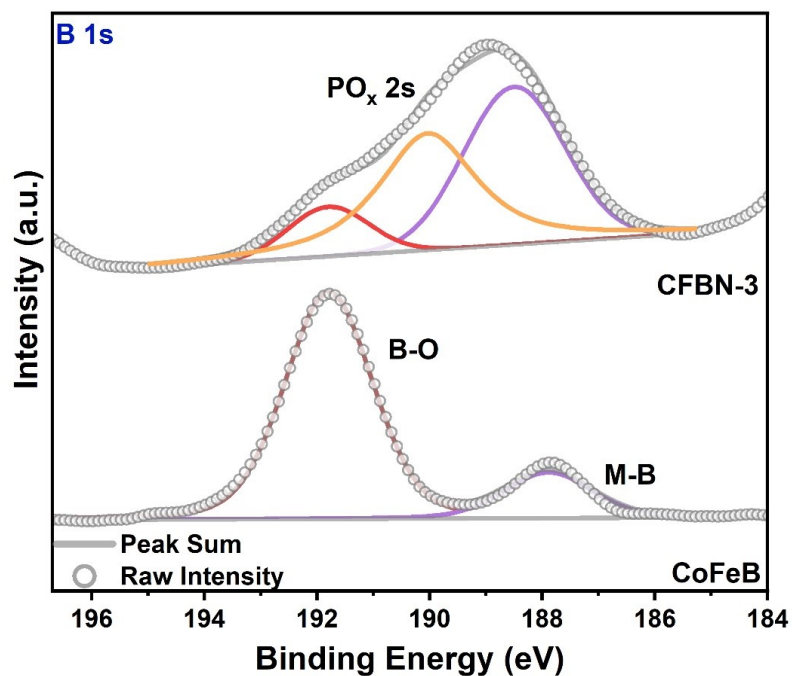

Fig. S17. B1s spectrum of CFBN-3 and CoFeB.

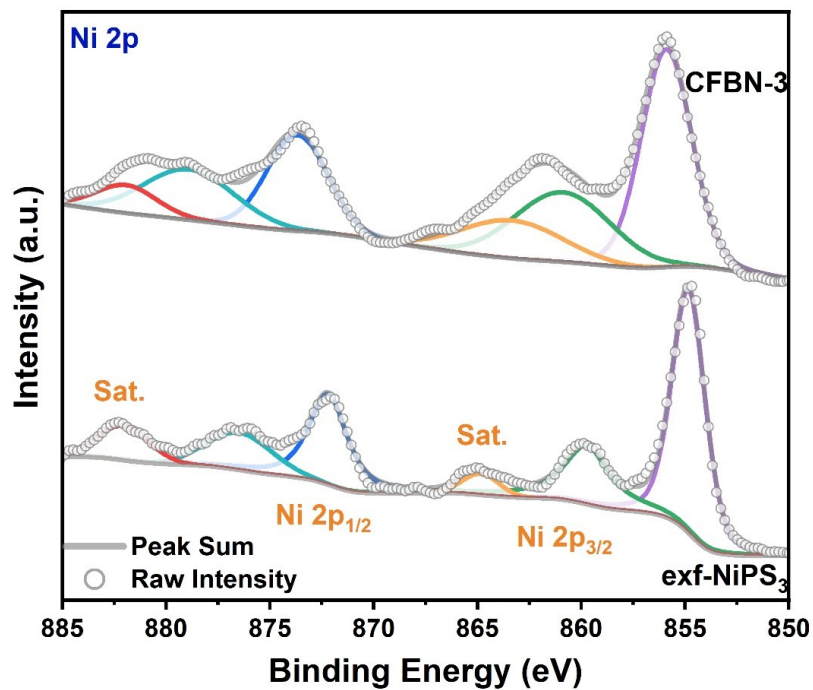

Fig. S18. Ni 2p spectra of CFBN-3 and exf-NiPS<sub>3</sub>.

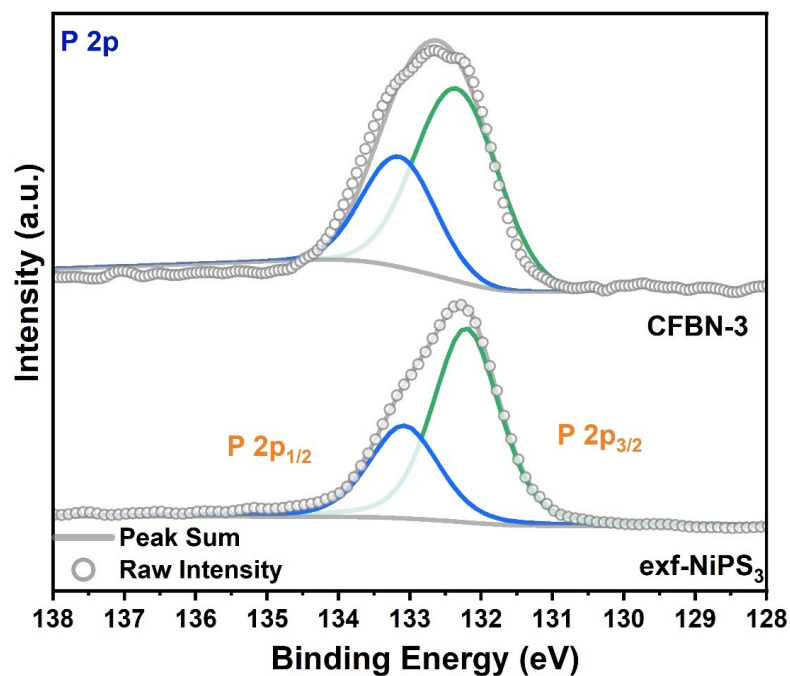

Fig. S19. P 2p spectra of CFBN-3 and exf-NiPS<sub>3</sub>.

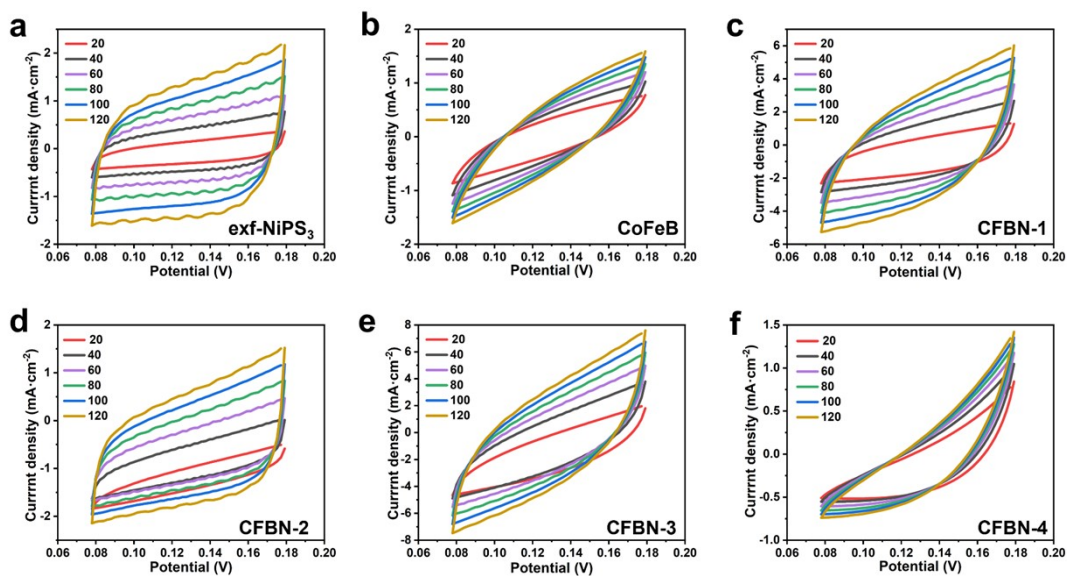

**Fig. S20.** The current-potential curves of samples with different scan rates for OER process in 1 M KOH: (a) exf-NiPS<sub>3</sub>, (b) CoFeB, (c) CFBN-1, (d) CFBN-2, (e) CFBN-3, and (f) CFBN-4.

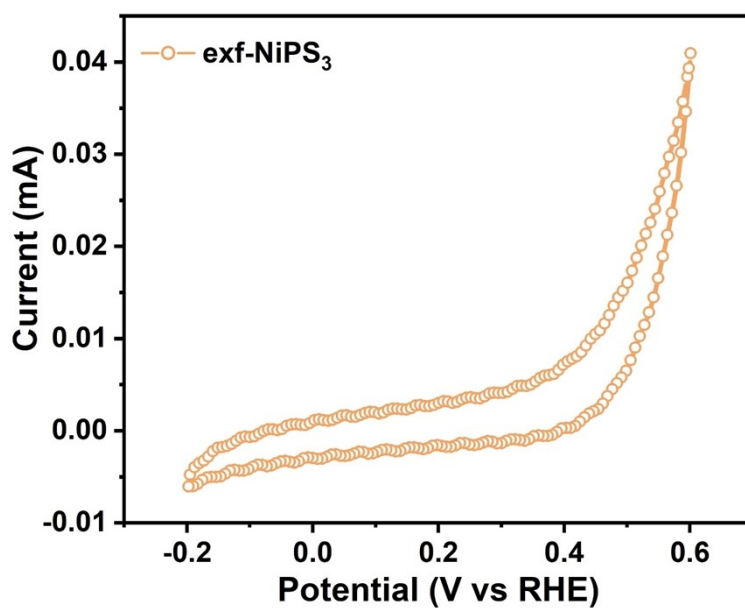

**Fig. S21.** CV curve for exf-NiPS<sub>3</sub> electrode in the potential ranges between -0.2 V vs. RHE and 0.6 V vs. RHE in 1 M PBS. The scan rate was 50 mV·s<sup>-1</sup>.

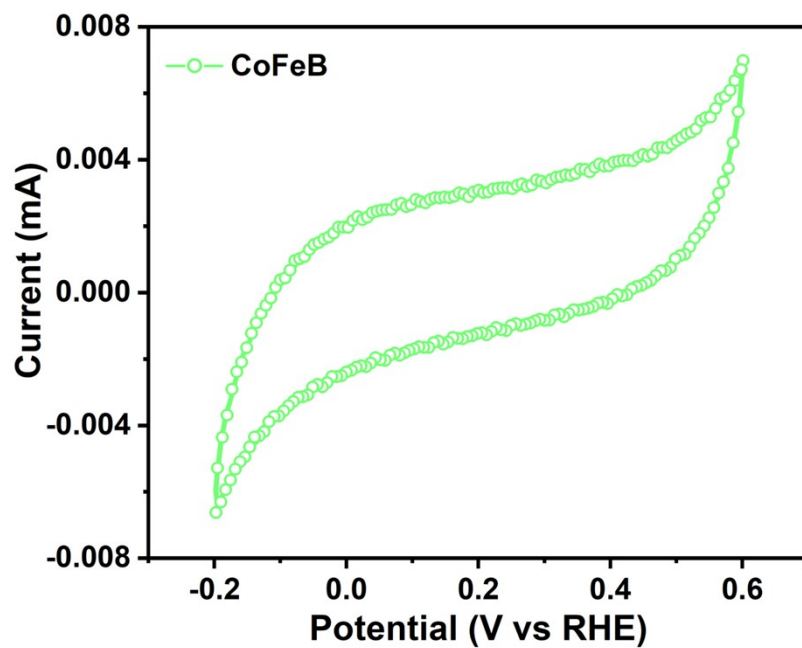

**Fig. S22.** CV curve for CoFeB electrode in the potential ranges between  $-0.2$  V vs. RHE and  $0.6$  V vs. RHE in  $1$  M PBS. The scan rate was  $50$   $\text{mV}\cdot\text{s}^{-1}$ .

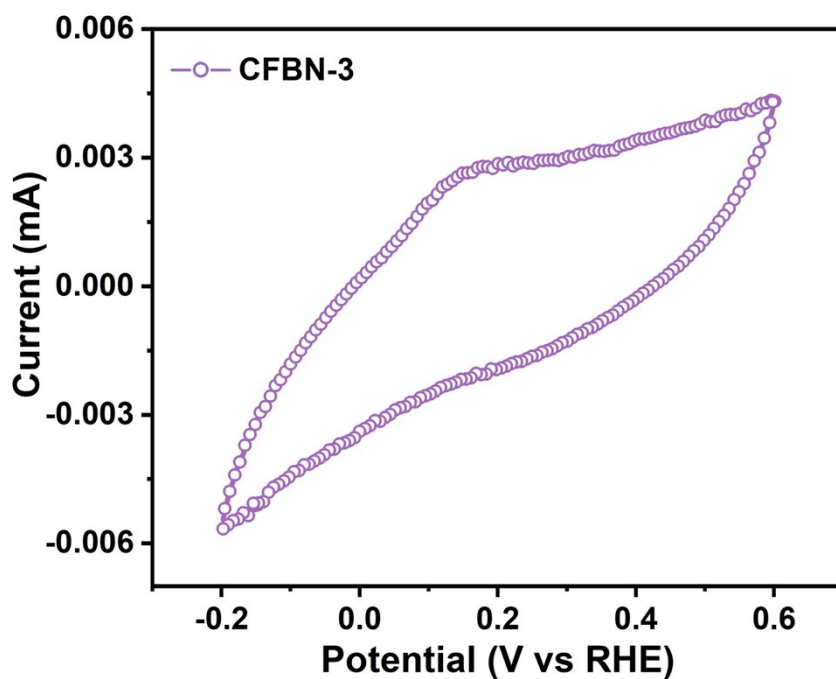

**Fig. S23.** CV curve for CFBN-3 electrode in the potential ranges between  $-0.2$  V vs. RHE and  $0.6$  V vs. RHE in  $1$  M PBS. The scan rate was  $50$   $\text{mV}\cdot\text{s}^{-1}$ .

**Table S1.** The calculation values of OER. (calibration at 298.15 K, the unit of the physical quantity is eV, U = 0 V).

| System                  | Site | G*      | G <sub>H2O</sub> | G <sub>H2</sub> | G <sub>O2</sub> | ΔG <sub>1</sub> | ΔG <sub>2</sub> | ΔG <sub>3</sub> | ΔG <sub>4</sub> | η    |
|-------------------------|------|---------|------------------|-----------------|-----------------|-----------------|-----------------|-----------------|-----------------|------|
| CoFeB                   | Fe   | -453.54 | -14.22           | -6.8            | -9.91           | -1.43           | 0.28            | 1.85            | 0.91            | 1.45 |
| NiPS <sub>3</sub>       | P    | -205.59 |                  |                 |                 | -0.40           | -0.41           | 2.02            | 0.40            | 1.62 |
|                         | S    |         |                  |                 |                 | 1.05            | -1.12           | 2.82            | -1.14           | 2.42 |
| CoFeB/NiPS <sub>3</sub> | Fe   | -669.76 |                  |                 |                 | -0.78           | 0.42            | 1.31            | 0.65            | 0.91 |

**Table S2.** Comparison of the oxygen evolution reaction (OER) performance of CoFeB/NiPS<sub>3</sub> with that of representative catalysts of similar elements or structures in 1 M KOH.

| Catalysts                                               | η <sub>OER@10 mA cm<sup>-2</sup></sub> | Tafel slope                | References       |
|---------------------------------------------------------|----------------------------------------|----------------------------|------------------|
|                                                         | (mV)                                   | (mV•decade <sup>-1</sup> ) |                  |
| MoS <sub>2</sub> /NiPS <sub>3</sub>                     | 296                                    | 86                         | 1                |
| S-FeOOH/IF                                              | 244                                    | 59                         | 2                |
| ZnCo <sub>2</sub> O <sub>4-x</sub> F <sub>x</sub> /CNTs | 350                                    | 59.2                       | 3                |
| Ru/Co-N-C                                               | 247                                    | 27.8                       | 4                |
| P-Ce SAs@CoO                                            | 261                                    | 75                         | 5                |
| Co-N <sub>4</sub> -pyridinic SACs                       | 351                                    | 84                         | 6                |
| CoNiFeMoCr                                              | 310                                    | /                          | 7                |
| Ru-Co/ELCO                                              | 247                                    | 49.1                       | 8                |
| a-NiCo/NC                                               | 252                                    | 49                         | 9                |
| Porous Ni <sub>3</sub> S <sub>4</sub>                   | 257                                    | 67                         | 10               |
| Co/Fe-SNC                                               | 240                                    | 47.92                      | 11               |
| F-CDs/CoP/NF,                                           | 250                                    | 96                         | 12               |
| <b>CoFeB/NiPS<sub>3</sub></b>                           | <b>235</b>                             | <b>96(50)</b>              | <b>This work</b> |

## Supplemental References

1. Y. Liu, Y. Chen, Y. Tian, T. Sakthivel, H. Liu, S. Guo, H. Zeng and Z. Dai, *Adv. Mater.*, 2022, **34**, 2203615.
2. X. Chen, Q. Wang, Y. Cheng, H. Xing, J. Li, X. Zhu, L. Ma, Y. Li and D. Liu, *Adv. Funct. Mater.*, 2022, **32**, 2112674.
3. K. Xiao, Y. Wang, P. Wu, L. Hou and Z.-Q. Liu, *Angew. Chem. Int. Ed.*, 2023, **62**, e202301408.
4. C. Rong, X. Shen, Y. Wang, L. Thomsen, T. Zhao, Y. Li, X. Lu, R. Amal and C. Zhao, *Adv. Mater.*, 2022, **34**, 2110103.
5. M. Li, X. Wang, K. Liu, H. Sun, D. Sun, K. Huang, Y. Tang, W. Xing, H. Li and G. Fu, *Adv. Mater.*, 2023, **35**, 2302462.
6. P. Kumar, K. Kannimuthu, A. S. Zeraati, S. Roy, X. Wang, X. Wang, S. Samanta, K. A. Miller, M. Molina, D. Trivedi, J. Abed, M. A. Campos Mata, H. Al-Mahayni, J. Baltrusaitis, G. Shimizu, Y. A. Wu, A. Seifitokaldani, E. H. Sargent, P. M. Ajayan, J. Hu and M. G. Kibria, *J. Am. Chem. Soc.*, 2023, **145**, 8052-8063.
7. I. A. Cechanaviciute, R. P. Antony, O. A. Krysiak, T. Quast, S. Dieckhöfer, S. Saddeler, P. Telaar, Y.-T. Chen, M. Muhler and W. Schuhmann, *Angew. Chem. Int. Ed.*, 2023, **62**, e202218493.
8. X. Zheng, J. Yang, Z. Xu, Q. Wang, J. Wu, E. Zhang, S. Dou, W. Sun, D. Wang and Y. Li, *Angew. Chem. Int. Ed.*, 2022, **61**, e202205946.
9. Z. Pei, X. F. Lu, H. Zhang, Y. Li, D. Luan and X. W. Lou, *Angew. Chem. Int. Ed.*, 2022, **61**, e202207537.
10. K. Wan, J. Luo, C. Zhou, T. Zhang, J. Arbiol, X. Lu, B.-W. Mao, X. Zhang and J. Fransaer, *Adv. Funct. Mater.*, 2019, **29**, 1900315.
11. C. Chen, M. Sun, F. Zhang, H. Li, M. Sun, P. Fang, T. Song, W. Chen, J. Dong, B. Rosen, P. Chen, B. Huang and Y. Li, *Energy Environ. Sci.*, 2023, **16**, 1685-1696.
12. H. Song, J. Yu, Z. Tang, B. Yang and S. Lu, *Adv. Energy Mater.*, 2022, **12**, 2102573.
